# Supplementary material
Source: PubMed Central journal article supplement (PMC1599940)

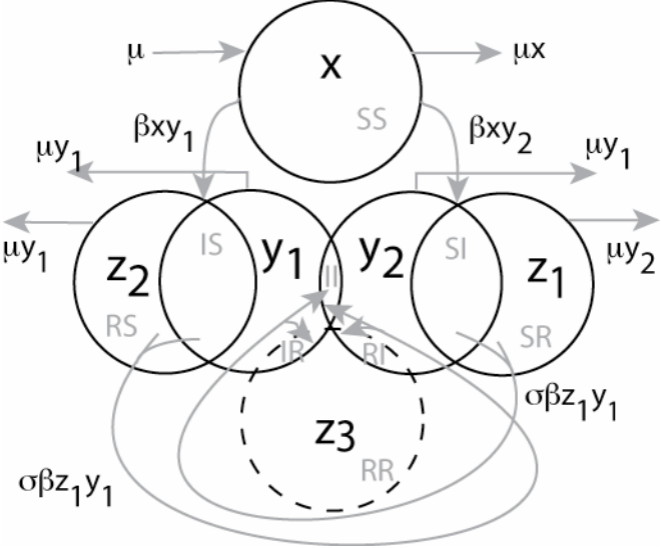

Supplement: pnas_0602768103_1.pdf [file pnas_0602768103_1.pdf]
